# Supplementary material
Source: publisher figshare collection journal article supplement (https://acs.figshare.com/ndownloader/files/12029381)
Supplement: Supplementary file 1 [file 12029381]

**Supporting Information for:**

**Theoretical Insight into Catalytic Propane  
Dehydrogenation on Ni(111)**

Tinnakorn Saelee,<sup>†</sup> Supawadee Namuangruk,<sup>§</sup> Nawee Kungwan,<sup>\*,†,‡</sup>  
and Anchalee Junkaew<sup>\*,§</sup>

<sup>†</sup>*Department of Chemistry, Faculty of Science, Chiang Mai University, Chiang Mai, 50200,  
Thailand*

<sup>‡</sup>*Center of Excellence in Materials Science and Technology, Chiang Mai University, Chiang  
Mai 50200, Thailand*

<sup>§</sup>*National Nanotechnology Center (NANOTEC), National Science and Technology  
Development Agency (NSTDA), Pathum Thani 12120, Thailand*

*\*Corresponding author e-mails: [nawee.kung@gmail.com](mailto:nawee.kung@gmail.com) (N.K), [anchalee@nanotec.or.th](mailto:anchalee@nanotec.or.th) (A.J.)*

## 1. Propane and propylene adsorption on Ni(111)

Optimized possible structures of propane and propylene adsorption on Ni(111). An asterisk (\*) denotes the most stable adsorbed structure of each adsorbate.

**Table S1.** All possible configurations of propane adsorption on Ni(111) and  $E_{\text{ads}}$  in eV

| Propane1                                                                            | Propane2                                                                            | Propane3                                                                            | Propane4                                                                             | Propane5                                                                              | Propane6                                                                              |
|-------------------------------------------------------------------------------------|-------------------------------------------------------------------------------------|-------------------------------------------------------------------------------------|--------------------------------------------------------------------------------------|---------------------------------------------------------------------------------------|---------------------------------------------------------------------------------------|
| 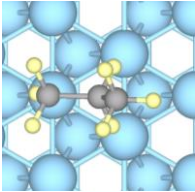   |    |    |    |    |    |
|   |   |   |   |   |   |
| $E_{\text{ads}} = -0.47$                                                            | $E_{\text{ads}} = -0.38$                                                            | $E_{\text{ads}} = -0.51$                                                            | $E_{\text{ads}} = -0.47$                                                             | $E_{\text{ads}} = -0.50$                                                              | $E_{\text{ads}} = -0.48$                                                              |
| Propane7                                                                            | Propane8                                                                            | Propane9                                                                            | Propane10                                                                            | Propane11                                                                             | Propane12                                                                             |
|  |  |  |  |  |  |
|  |  |  |  |  |  |
| $E_{\text{ads}} = -0.61^*$                                                          | $E_{\text{ads}} = -0.57$                                                            | $E_{\text{ads}} = -0.54$                                                            | $E_{\text{ads}} = -0.51$                                                             | $E_{\text{ads}} = -0.38$                                                              | $E_{\text{ads}} = -0.36$                                                              |

**Table S2.** All possible configurations of propylene adsorption on Ni(111) and  $E_{\text{ads}}$  in eV

| Propylene1                                                                          | Propylene2                                                                          | Propylene3                                                                          | Propylene4                                                                           | Propylene5                                                                            | Propylene6                                                                            | Propylene7                                                                            | Propylene8                                                                            |
|-------------------------------------------------------------------------------------|-------------------------------------------------------------------------------------|-------------------------------------------------------------------------------------|--------------------------------------------------------------------------------------|---------------------------------------------------------------------------------------|---------------------------------------------------------------------------------------|---------------------------------------------------------------------------------------|---------------------------------------------------------------------------------------|
| 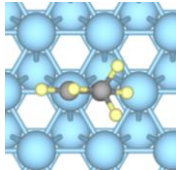   |    |    |    |    |    |    |    |
|    |    |    |    |    |    |    |    |
| $E_{\text{ads}} = -0.31$                                                            | $E_{\text{ads}} = -0.38$                                                            | $E_{\text{ads}} = -0.41$                                                            | $E_{\text{ads}} = -0.40$                                                             | $E_{\text{ads}} = -0.41$                                                              | $E_{\text{ads}} = -0.44$                                                              | $E_{\text{ads}} = -1.15$                                                              | $E_{\text{ads}} = -1.39^*$                                                            |
| Propylene9                                                                          | Propylene10                                                                         | Propylene11                                                                         | Propylene12                                                                          | Propylene13                                                                           | Propylene14                                                                           | Propylene15                                                                           | Propylene16                                                                           |
|   |   |   |   |   |   |   |   |
|  |  |  |  |  |  |  |  |
| $E_{\text{ads}} = -0.44$                                                            | $E_{\text{ads}} = -0.43$                                                            | $E_{\text{ads}} = -0.35$                                                            | $E_{\text{ads}} = -0.34$                                                             | $E_{\text{ads}} = -0.27$                                                              | $E_{\text{ads}} = -0.30$                                                              | $E_{\text{ads}} = -0.43$                                                              | $E_{\text{ads}} = -0.44$                                                              |

## 2. Electronic charge analysis

**Table S3.** Bader charge analysis of selected atoms of Ni(111), propane and propylene before and during adsorption represented in Figure 2

| Bader Charge change ( <i>e</i> ) |                  |          |                    |          |                |          |
|----------------------------------|------------------|----------|--------------------|----------|----------------|----------|
| System                           | Ni(111)          |          | Adsorbed molecules |          |                |          |
|                                  |                  |          | Propane            |          | Propylene      |          |
| Isolated phase                   | Total            | (0.000)  | Total              | (0.000)  | Total          | (0.000)  |
|                                  | Subsurface layer | (-0.084) | C <sup>1</sup>     | (+0.178) |                |          |
|                                  | Top layer        | (-0.060) | C <sup>2</sup>     | (-0.221) |                |          |
|                                  |                  |          | C <sup>3</sup>     | (+0.162) |                |          |
|                                  | Ni <sup>1</sup>  | (-0.026) | H <sup>1</sup>     | (-0.048) |                |          |
|                                  | Ni <sup>2</sup>  | (+0.046) | H <sup>2</sup>     | (-0.047) |                |          |
|                                  | Ni <sup>3</sup>  | (-0.150) | H <sup>3</sup>     | (-0.039) |                |          |
|                                  | Ni <sup>1</sup>  | (-0.057) |                    |          | C <sup>1</sup> | (-0.109) |
|                                  | Ni <sup>2</sup>  | (-0.041) |                    |          | C <sup>2</sup> | (-0.102) |
|                                  | Ni <sup>3</sup>  | (+0.046) |                    |          | C <sup>3</sup> | (-0.192) |
|                                  |                  |          |                    |          | H <sup>1</sup> | (+0.134) |
|                                  |                  |          |                    |          | H <sup>2</sup> | (-0.042) |
| Propane adsorption               | Total            | (-0.264) | Total              | (+0.264) |                |          |
|                                  | Subsurface layer | (-0.027) | C <sup>1</sup>     | (-0.097) |                |          |
|                                  | Top layer        | (-0.236) | C <sup>2</sup>     | (-0.206) |                |          |
|                                  |                  |          | C <sup>3</sup>     | (-0.161) |                |          |
|                                  | Ni <sup>1</sup>  | (+0.129) | H <sup>1</sup>     | (+0.272) |                |          |
|                                  | Ni <sup>2</sup>  | (+0.316) | H <sup>2</sup>     | (+0.202) |                |          |
|                                  | Ni <sup>3</sup>  | (+0.072) | H <sup>3</sup>     | (+0.135) |                |          |
| Propylene adsorption             | Total            | (-0.545) |                    |          | Total          | (+0.545) |
|                                  | Subsurface layer | (-0.643) |                    |          |                |          |
|                                  | Top layer        | (+0.303) |                    |          |                |          |
|                                  | Ni <sup>1</sup>  | (+0.020) |                    |          | C <sup>1</sup> | (+0.013) |
|                                  | Ni <sup>2</sup>  | (+0.139) |                    |          | C <sup>2</sup> | (+0.085) |
|                                  | Ni <sup>3</sup>  | (-0.138) |                    |          | C <sup>3</sup> | (-0.186) |
|                                  |                  |          |                    |          | H <sup>1</sup> | (+0.154) |
|                                  |                  |          |                    |          | H <sup>2</sup> | (+0.160) |

### 3. Kinetic analysis

To indicate the kinetically favorable pathway for the main PDH in this study, we have compared the reaction rates of IS→TSA1 and IS→TSB1, the rate determining steps for C-H activation of pathways A and B.

Based on the transition-state theory (TST), a rate constant of an elementary reaction can be calculated from Eq. S1. [1]

$$k = A \exp\left(-\frac{E_a}{k_B T}\right) \quad (S1)$$

where A is the pre-exponential/frequency factor.  $E_a$  is an activation energy of the elementary step,  $k_b$  is Boltzmann's constant, and T is temperature. The pre-exponential factor can be obtained from Eq. S2.

$$A = \frac{k_B T}{h} \exp\left(\frac{\Delta S^\ddagger}{k_B}\right) \quad (S2)$$

where the entropy barrier,  $\Delta S^\ddagger$ , can be calculated from  $S_{TS} - S_{\text{reactant}}$ .  $E_a$  can be obtained from Eq. S3.

$$E_a = \Delta^\ddagger E_{DFT} + \Delta^\ddagger ZPE \quad (S3)$$

$$ZPE = \sum_{i=1}^{\#modes} \frac{h\nu_i}{2} \quad (S4)$$

$\Delta^\ddagger E_{DFT}$  and  $\Delta^\ddagger ZPE$  denote the energy barrier from DFT calculation and the zero point energy barrier, respectively.  $h$  and  $\nu_i$  are Plank's constant and the vibrational frequency of  $i$  mode.

In this study, the reactions rates of IS→TSA1 and IS→TSB1, which are the rate determining steps for C-H activation of pathways 1A and 2A, are defined as  $k^{TSA1}$  and  $k^{TSB1}$ , respectively. It is to be noted that these two elementary steps have the same initial state (IS), therefore the ratio of  $k^{TSA1}$  and  $k^{TSB1}$  can be obtained by Eq. S5 or S6.

$$\frac{k^{TSA1}}{k^{TSB1}} = \frac{A^{TSA1}}{A^{TSB1}} \exp\left(-\frac{(E_a^{TSA1} - E_a^{TSB1})}{k_B T}\right) \quad (S5)$$

$$\frac{k^{TSA1}}{k^{TSB1}} = \exp\left(\frac{S^{TSA1} - S^{TSB1}}{k_B}\right) \exp\left(-\frac{(E_{DFT}^{TSA1} + ZPE^{TSA1} - E_{DFT}^{TSB1} - ZPE^{TSB1})}{k_B T}\right) \quad (S6)$$

By neglecting entropy contributions from the translational and rotational degree of freedom, the entropy of the adsorbed intermediate can be estimated from vibrational contribution,  $S_{vib}$ , in Eq. S7 and S8.

$$S \approx S_{vib} = k_B \sum_{i=1}^{\#modes} \frac{h\nu_i}{2} \left( \frac{x_i}{e^{x_i} - 1} - \ln(1 - e^{-x_i}) \right) \quad (S7)$$

$$x_i = \frac{h\nu_i}{k_B T} \quad (S8)$$

As a result, the calculated  $k^{\text{TSA1}}/k^{\text{TSB1}}$  values in range of 298K to 900K signify that pathway A is more kinetically preferable than another pathway (see Table S4).

**Table S4** Comparison of  $k^{\text{TSA1}}/k^{\text{TSB1}}$  at different temperature

| T (K) | $k^{\text{TSA1}}/k^{\text{TSB1}}$ |
|-------|-----------------------------------|
| 298   | $2.05 \times 10^4$                |
| 400   | $4.87 \times 10^3$                |
| 500   | $2.12 \times 10^3$                |
| 600   | $1.23 \times 10^3$                |
| 700   | $8.34 \times 10^2$                |
| 800   | $6.24 \times 10^2$                |
| 900   | $4.99 \times 10^2$                |

#### References:

[1] Gokhale, A. A.; Kandoi, S.; Greeley, J.P.; Mavrikakis, M.; Dumesic, J.A. Molecular-level Descriptions of Surface Chemistry in Kinetic Models using Density Functional Theory. Chem. Eng. Sci. **2004**, 59 (22-23), 4679-4691.
